# Supplementary material for: A novel star-shaped trinuclear platinum(ii) complex based on a 1,3,5-triazine core displaying potent antiproliferative activity against TNBC by the mitochondrial injury and DNA damage mechanism
Source: Royal Society of Chemistry journal article supplement (doi:10.1039/d2dt00895e), 2022-01-01
Supplement: d2dt00895e1.pdf [file d2dt00895e1.pdf]

## Supplementary Material

### A novel star-shaped trinuclear platinum(II) complex based on a 1,3,5-triazine core displaying potent antiproliferative activity against TNBC by mitochondria injury and DNA damage mechanism

Yixuan Wu, Dandan Zhao, Jinting Shang, Wenxin Huang, Zhanfen Chen\*

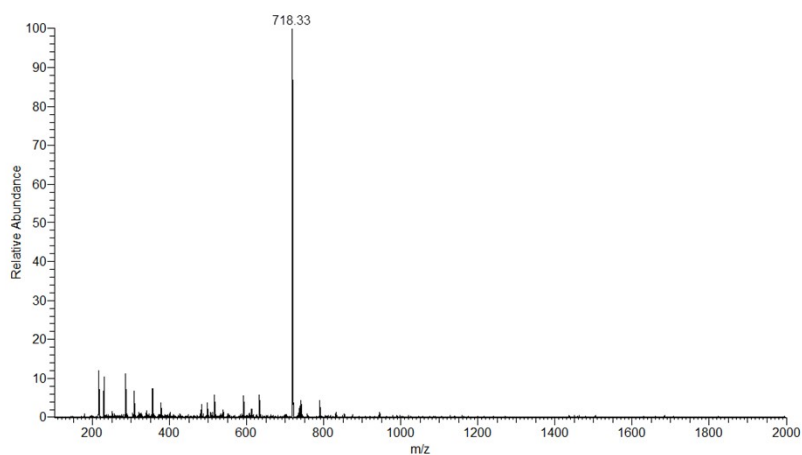

**Fig. S1** ESI-MS spectra of 2,4,6-tris[(2-hydroxybenzyl)(2-pyridylmethyl)amine]-1,3,5-triazine (**L**) in methanol.

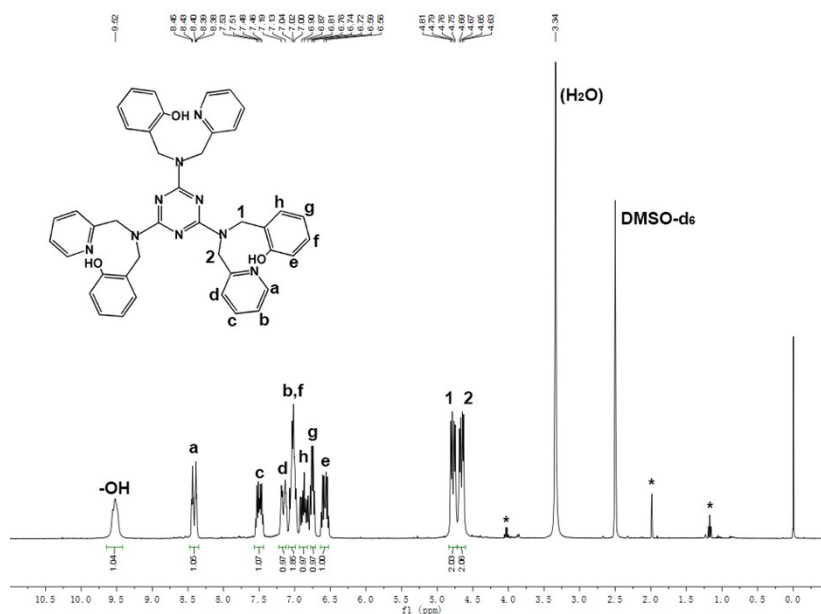

**Fig. S2** <sup>1</sup>H NMR of 2,4,6-tris[(2-hydroxybenzyl)(2-pyridylmethyl)amine]-1,3,5-triazine (**L**) in DMSO-*d*<sub>6</sub>. The signals marked with \* are for the protons from residual solvent ethyl acetate.

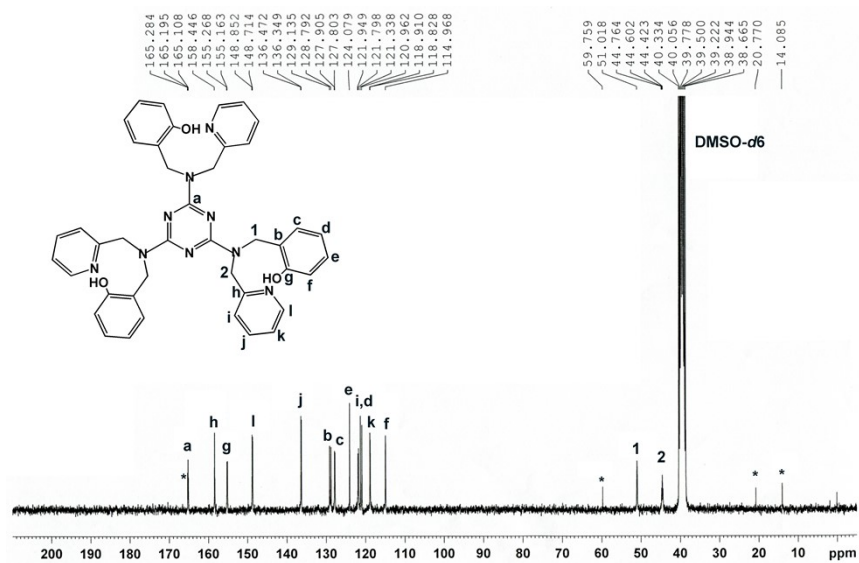

**Fig. S3**  $^{13}\text{C}$  NMR of 2,4,6-tris[(2-hydroxybenzyl)(2-pyridylmethyl)amine]-1,3,5-triazine (**L**) in  $\text{DMSO-}d_6$ . The signals marked with \* are for the carbons from residual solvent ethyl acetate.

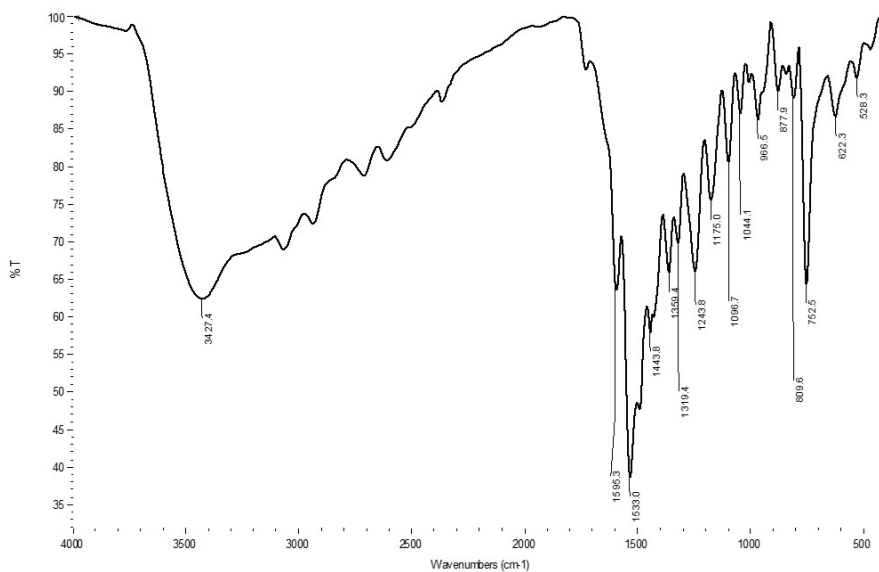

**Fig. S4** IR Spectra of 2,4,6-tris[(2-hydroxybenzyl)(2-pyridylmethyl)amine]-1,3,5-triazine (**L**).



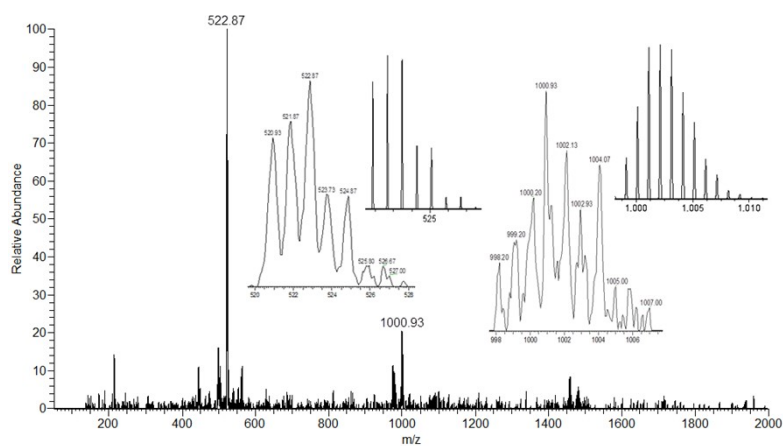

**Fig. S7** ESI-MS spectra of complex **2** in methanol.

**Table S1** Characteristic IR bands ( $\text{cm}^{-1}$ ) of the ligands and their respective platinum(II) complexes.

| Assignment                     | $[\text{Pt}_3(\text{L}-3\text{H})\text{Cl}_3]$ ( <b>1</b> ) | <b>L</b> | $[\text{Pt}(\text{L}'-\text{H})\text{Cl}]$ ( <b>2</b> ) | <b>L'</b> |
|--------------------------------|-------------------------------------------------------------|----------|---------------------------------------------------------|-----------|
| $\nu_{\text{C-H}}$ aromatic    | 3088                                                        | 3032     | 3147                                                    | 3049      |
| $\nu_{\text{C=N}}$             | 1533                                                        | 1533     | 1603                                                    | 1593      |
| $\nu_{\text{C=C}}$             | 1485                                                        | 1443     | 1452                                                    | 1457      |
| $\delta(\text{pyridine ring})$ | 761                                                         | 752      | 766                                                     | 752       |
| $\delta(\text{OH-phenol})$     | —                                                           | 1359     | —                                                       | 1351      |

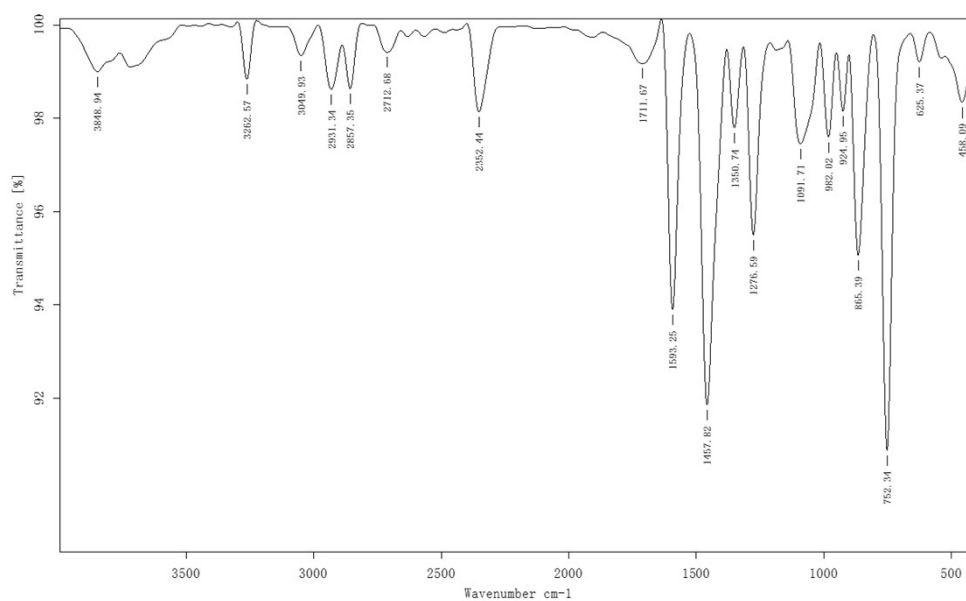

**Fig. S8** IR Spectra of (2-hydroxybenzyl)(2-pyridylmethyl)amine (**L'**).

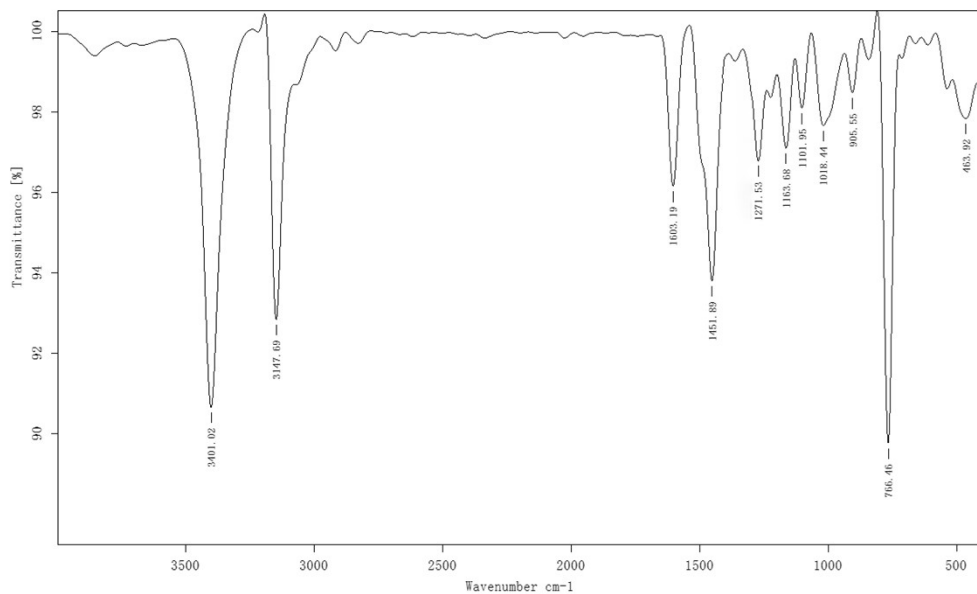

**Fig. S9** IR Spectra of complex 2.

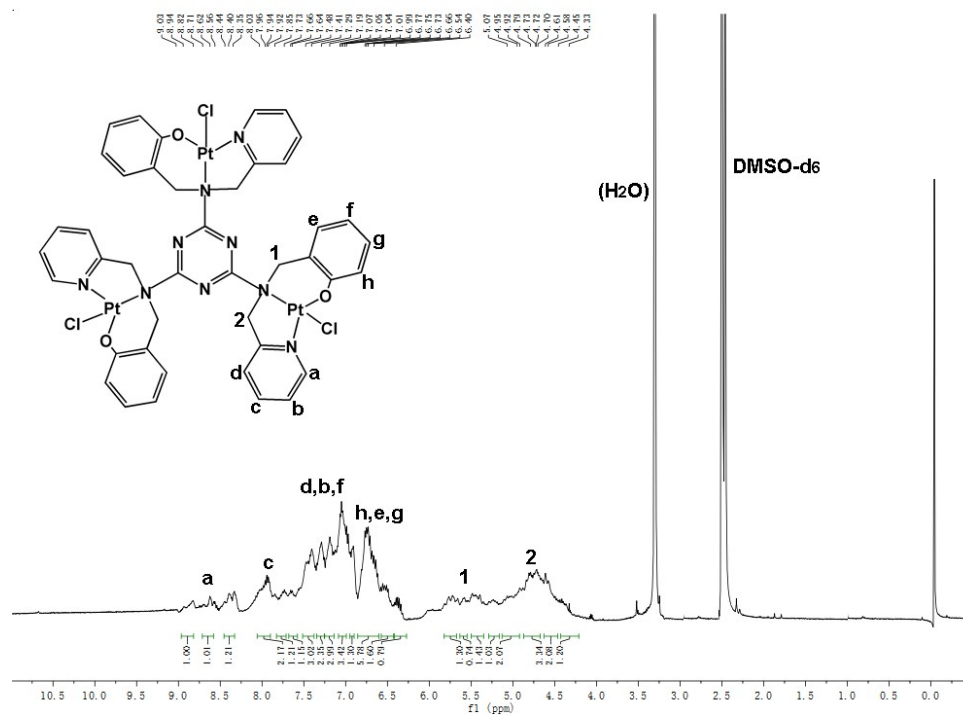

**Fig. S10**  $^1\text{H}$  NMR spectra of  $[\text{Pt}_3(\text{L}-3\text{H})\text{Cl}_3]$  (1) in  $\text{DMSO}-d_6$ .

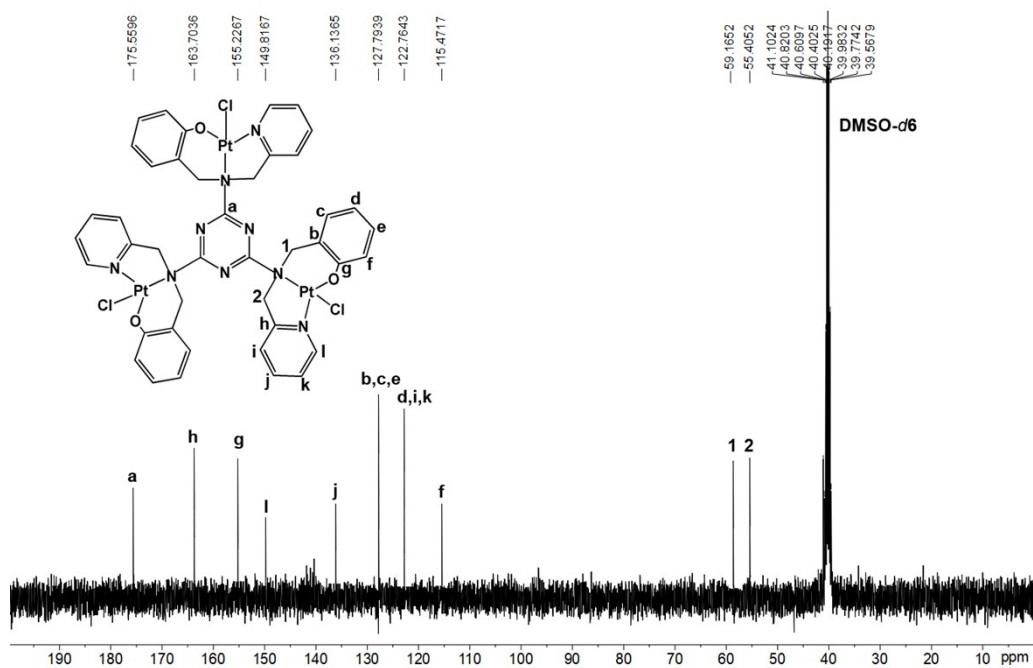

**Fig. S11**  $^{13}C$  NMR spectra of  $[Pt_3(L-3H)Cl_3]$  (1) in DMSO- $d_6$ .

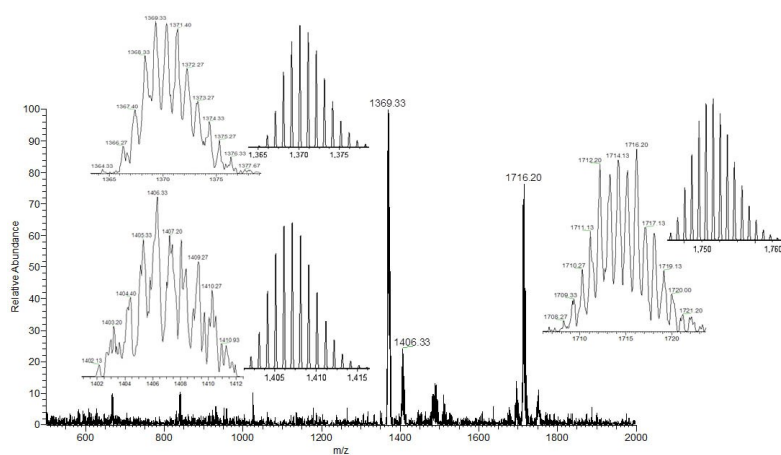

**Fig. S12** ESI-MS spectra of complex 1 in methanol.

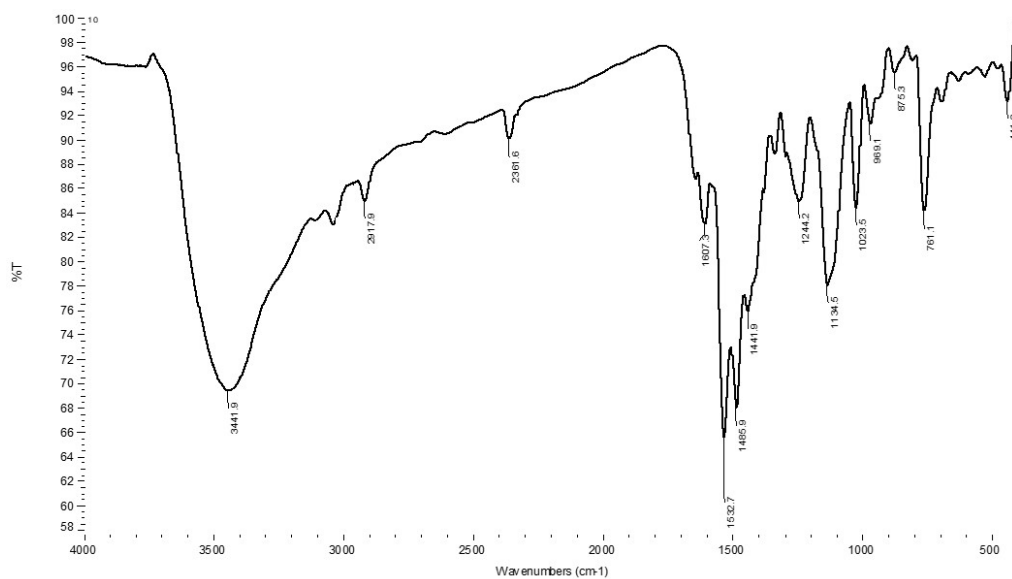

**Fig. S13** IR Spectra of complex 1.

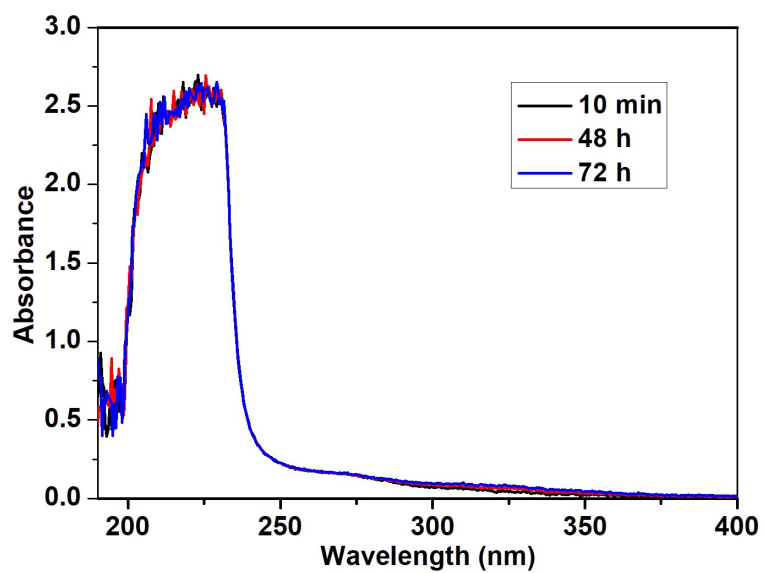

**Fig. S14** The absorption spectra of 1 (25  $\mu$ M, 0.3% DMSO) in cell culture media (Roswell Park Memorial Institute (RPMI) 1640 medium) at 10 min, 48 h, 72 h.

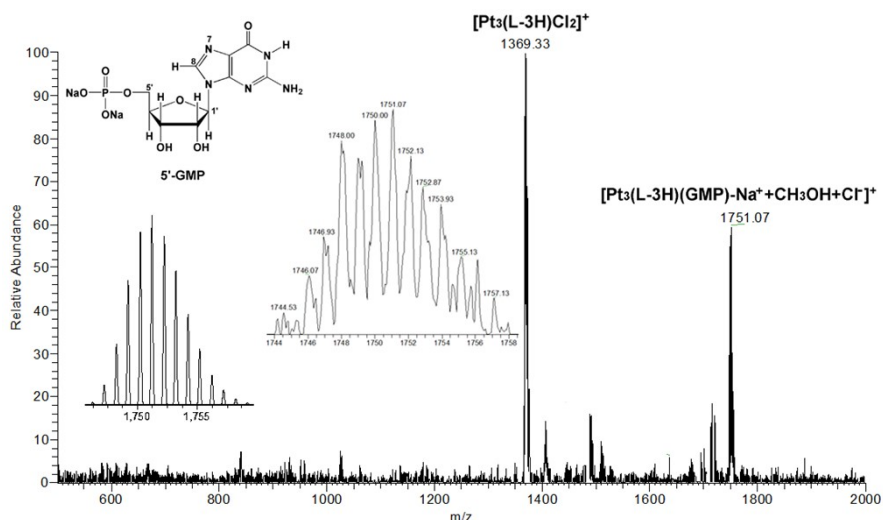

**Fig. S15** ESI-MS spectrum (positive mode) of the reaction between complex **1** and 5'-GMP (1: 3.5) recorded in methanol/water (v/v, 1:1) at 37 °C for 24 h. Assignments: 1751.07,  $[\text{Pt}_3(\text{L}-3\text{H})(\text{GMP})-\text{Na}^+ + \text{CH}_3\text{OH} + \text{Cl}]^+$  ( $\text{Pt}_3\text{C}_{53}\text{H}_{52}\text{N}_{14}\text{O}_{12}\text{PNaCl}$ , calcd 1751.31 ); 1369.33,  $[\text{Pt}_3(\text{L}-3\text{H})\text{Cl}_2]^+$  ( $\text{Pt}_3\text{C}_{42}\text{H}_{36}\text{N}_9\text{O}_3\text{Cl}_2$ , calcd 1369.12).

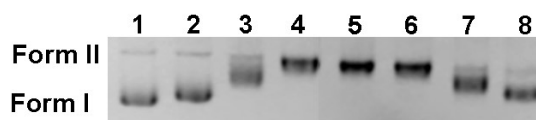

**Fig. S16** Agarose gel electrophoresis patterns of supercoiled pUC19 plasmid DNA incubated with complex **1** at 37 °C for 24 h. Lane 1, control; lanes 2–8, the  $r_1$  values of 0.015, 0.03, 0.045, 0.06, 0.12, 0.18, 0.24, respectively.
